# Supplementary material for: A continuum model for meltwater flow through compacting snow
Source: Copernicus journal article supplement (doi:10.5194/tc-11-2799-2017), 2017-12-11
Supplement: Supplementary file [file tc-11-2799-2017-supplement-title-page.pdf › tc-11-2799-2017-supplement-title-page.pdf]

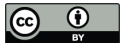

## *Supplement of*

# **A continuum model for meltwater flow through compacting snow**

**C. R. Meyer and I. J. Hewitt**

*Correspondence to:* Colin R. Meyer ([colinrmeyer@gmail.com](mailto:colinrmeyer@gmail.com))

- [tc-11-2799-2017-supplement-title-page.pdf](#)
- SupplementCode
  - AdvectiveFlux.m
  - CompactionFunction.m
  - EnthalpyDiffusiveFlux.m
  - FullySaturatedWaterPressure.m
  - README.txt
  - RunCode.m
  - SaturationDiffusiveFlux.m
  - TemperatureDiffusiveFlux.m
  - conversiontoenthalpy.m
  - conversiontotemperature.m

The copyright of individual parts of the supplement might differ from the CC BY 4.0 License.
